# Supplementary material for: Laminarin promotes anti-cancer immunity by the maturation of dendritic cells
Source: PubMed Central journal article supplement (PMC5503553; doi:10.18632/oncotarget.16170), 2017-03-14
Supplement: oncotarget-08-38554-s001.pdf [file oncotarget-08-38554-s001.pdf]

## Laminarin promotes anti-cancer immunity by the maturation of dendritic cells

### SUPPLEMENTARY MATERIALS

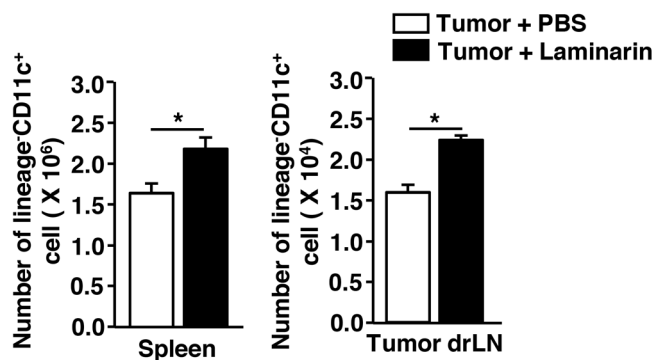

**Supplementary Figure 1: Laminarin induced increases in the DC numbers in spleen and tumor drNL in the tumor-bearing mice.** C57BL/6 mice were injected subcutaneously (*s.c.*) with  $1 \times 10^6$  B16 melanoma cells. On day 10 after tumor cell injection, once tumors were well established, the mice were treated with 25 mg/kg ascophyllan for 24 hours and spleen and tumor draining lymph node (drLN) were harvested. Percentages of lineage<sup>+</sup>CD11c<sup>+</sup> DCs in spleen and tumor drLN were analyzed on a flow cytometry. Data are the average of analyses of 4 independent samples (2 mice per experiment, total 2 independent experiments). \* $p < 0.05$ .
